# Supplementary material for: The Relationship between Microbial Community Evenness and Function in Slow Sand Filters
Source: PubMed Central journal article supplement — mBio. 2015 Oct 13;6(5):e00729-15. doi: 10.1128/mBio.00729-15 (PMC4620458; doi:10.1128/mbio.00729-15), 2015-10-13
Supplement: mbo005152502sf2.pdf [file mbo005152502sf2.pdf]

Average (based on 5 replicas) Water Quality Parameters for the Influent of 2 industrial slow sand filters

| Filter | Additional Info | Sampled   | Age | TEMP  | PH   | NTU  | DO    | DOC  | UV   | SUVA | COD   | PO4  | NO3  | NO2  | NH4  | TVB     | TVB 13oC | Coliforms |
|--------|-----------------|-----------|-----|-------|------|------|-------|------|------|------|-------|------|------|------|------|---------|----------|-----------|
| A      | In service      | 19-Apr-11 | 393 | 12.60 | 7.97 | 1.18 | 8.81  | 4.80 | 0.11 | 2.19 | 8.05  | 0.24 | 0.01 | 0.00 | 0.26 | 2800.00 | 1000.00  | 900.00    |
| A      | In service      | 03-May-11 | 407 | 12.40 | 7.84 | 1.19 | 10.01 | 5.10 | 0.20 | 3.88 | 0.32  | 0.13 | 0.02 | 0.00 | 2.12 | 124.00  | 1332.00  | 3.90      |
| A      | In service      | 10-May-11 | 414 | 12.70 | 7.99 | 1.56 | 9.71  | 5.05 | 0.21 | 4.20 | 2.44  | 0.65 | 0.04 | 0.00 | 0.01 | 88.00   | 3370.00  | 21.00     |
| A      | In service      | 17-May-11 | 421 | 12.58 | 7.99 | 3.82 | 9.18  | 4.93 | 0.22 | 4.46 | 4.72  | 0.10 | 0.03 | 0.00 | 0.16 | 350.00  | 112.00   | 20.80     |
| A      | In service      | 31-May-11 | 435 | 12.78 | 8.44 | 1.30 | 10.29 | 5.02 | 0.21 | 4.14 | 9.13  | 5.91 | 0.01 | 0.00 | 2.63 | 52.80   | 15.40    | 13.80     |
| A      | Not in service  | 14-Jun-11 | 7   | 13.48 | 8.06 | 0.89 | 10.17 | 3.00 | 0.20 | 6.50 | 1.66  | 4.04 | 0.00 | 0.00 | 3.00 | 249.00  | 108.00   | 21.60     |
| A      | Not in service  | 21-Jun-11 | 14  | 14.28 | 7.30 | 0.94 | 9.72  | 1.90 | 0.18 | 9.56 | 1.80  | 7.89 | 0.00 | 0.00 | 2.64 | 180.00  | 36.00    | 52.80     |
| A      | In service      | 28-Jun-11 | 21  | 15.14 | 7.22 | 0.54 | 9.98  | 5.21 | 0.20 | 3.80 | 2.42  | 0.01 | 0.01 | 0.00 | 0.04 | 58.00   | 4.00     | 25.80     |
| A      | In service      | 06-Jul-11 | 29  | 13.64 | 7.20 | 0.58 | 9.72  | 5.12 | 0.22 | 4.30 | 1.00  | 0.04 | 0.01 | 0.01 | 0.04 | 288.00  | 6.00     | 89.80     |
| A      | In service      | 12-Jul-11 | 35  | 14.94 | 7.32 | 0.67 | 9.98  | 5.23 | 0.21 | 4.05 | 0.33  | 6.03 | 0.01 | 0.00 | 0.02 | 47.00   | 8.00     | 20.40     |
| A      | In service      | 19-Jul-11 | 42  | 16.66 | 7.10 | 0.71 | 8.71  | 5.00 | 0.20 | 4.00 | 13.93 | 0.03 | 0.01 | 0.00 | 0.03 | 111.00  | 15.80    | 38.40     |
| A      | In service      | 26-Jul-11 | 49  | 17.40 | 7.10 | 0.64 | 9.45  | 6.10 | 0.24 | 3.87 | 7.13  | 6.67 | 0.01 | 0.00 | 0.01 | 190.00  | 112.00   | 81.80     |
| A      | In service      | 24-Aug-11 | 78  | 15.74 | 7.12 | 0.24 | 9.31  | 4.42 | 0.11 | 2.49 | 6.15  | 7.87 | 0.02 | 0.01 | 0.01 | 132.00  | 76.00    | 42.80     |
| A      | Chlorine added  | 20-Sep-11 | 105 | 15.60 | 7.40 | 0.69 | 9.20  | 1.91 | 0.11 | 5.81 | 2.97  | 0.01 | 0.00 | 0.00 | 0.04 | 634.00  | 126.00   | 36.20     |
| B      | Not in service  | 10-May-11 | 7   | 12.58 | 8.00 | 1.30 | 9.78  | 4.95 | 0.22 | 4.51 | 1.95  | 0.18 | 0.06 | 0.00 | 0.00 | 218.00  | 596.00   | 334.00    |
| B      | Not in service  | 17-May-11 | 14  | 12.32 | 7.89 | 1.12 | 9.17  | 4.97 | 0.23 | 4.53 | 4.45  | 0.05 | 0.05 | 0.00 | 3.27 | 218.00  | 104.00   | 26.40     |
| B      | Not in service  | 31-May-11 | 28  | 12.60 | 5.86 | 0.97 | 10.40 | 5.17 | 0.22 | 4.20 | 4.87  | 0.22 | 0.02 | 0.00 | 3.20 | 45.20   | 10.60    | 10.60     |
| B      | In service      | 07-Jun-11 | 35  | 13.54 | 7.78 | 0.83 | 9.76  | 3.10 | 0.12 | 3.87 | 5.01  | 4.16 | 0.01 | 0.00 | 0.01 | 320.00  | 32.00    | 1.80      |
| B      | In service      | 14-Jun-11 | 42  | 13.70 | 7.78 | 0.79 | 10.21 | 2.70 | 0.11 | 4.11 | 2.27  | 5.64 | 0.00 | 0.01 | 0.01 | 1860.00 | 16.00    | 20.60     |
| B      | In service      | 21-Jun-11 | 49  | 14.02 | 6.98 | 1.62 | 9.63  | 2.90 | 0.21 | 7.11 | 2.10  | 0.11 | 0.00 | 0.01 | 0.93 | 585.00  | 0.00     | 35.80     |
| B      | In service      | 28-Jun-11 | 56  | 14.92 | 7.26 | 0.56 | 10.06 | 4.95 | 0.22 | 4.43 | 2.35  | 0.08 | 0.01 | 0.01 | 0.01 | 254.00  | 33.60    | 33.60     |
| B      | In service      | 06-Jul-11 | 64  | 13.36 | 7.08 | 0.60 | 9.97  | 5.14 | 0.22 | 4.28 | 11.40 | 0.06 | 0.02 | 0.00 | 0.01 | 268.00  | 0.00     | 100.00    |
| B      | In service      | 12-Jul-11 | 70  | 14.72 | 7.22 | 0.68 | 10.00 | 5.29 | 0.21 | 4.03 | 0.21  | 1.67 | 0.01 | 0.00 | 0.01 | 43.60   | 6.00     | 30.20     |
| B      | In service      | 19-Jul-11 | 77  | 16.80 | 7.10 | 0.80 | 8.92  | 5.00 | 0.22 | 4.40 | 10.03 | 7.20 | 0.02 | 0.00 | 0.04 | 75.20   | 56.60    | 47.60     |
| B      | In service      | 26-Jul-11 | 84  | 16.90 | 7.10 | 0.80 | 9.71  | 7.10 | 0.25 | 3.54 | 5.18  | 0.07 | 0.03 | 0.00 | 0.01 | 1500.00 | 183.00   | 24.80     |
| B      | In service      | 24-Aug-11 | 113 | 15.44 | 6.84 | 0.35 | 9.56  | 4.61 | 0.11 | 2.38 | 5.11  | 0.56 | 0.04 | 0.00 | 0.01 | 586.00  | 236.00   | 16.00     |
| B      | Chlorine added  | 20-Sep-11 | 140 | 13.12 | 7.68 | 1.60 | 10.22 | 2.92 | 0.12 | 4.01 | 3.30  | 0.19 | 0.01 | 0.00 | 0.03 | 1530.00 | 636.00   | 51.00     |
| B      | Chlorine added  | 18-Oct-11 | 168 | 9.22  | 6.90 | 0.34 | 10.17 | 2.32 | 0.12 | 5.00 | 1.00  | 5.15 | 0.06 | 0.00 | 0.02 | 342.00  | 236.00   | 2.40      |
