# Supplementary material for: The Relationship between Microbial Community Evenness and Function in Slow Sand Filters
Source: PubMed Central journal article supplement — mBio. 2015 Oct 13;6(5):e00729-15. doi: 10.1128/mBio.00729-15 (PMC4620458; doi:10.1128/mbio.00729-15), 2015-10-13
Supplement: mbo005152502sf3.pdf [file mbo005152502sf3.pdf]

Average (based on 5 replicas) Water Quality Parameters for the Effluent of Two Industrial Slow Sand Filters

| FILTER | Additional Info | Sampled   | AGE    | TEMP  | PH   | NTU  | DO   | DOC  | UV   | SUVA | COD   | PO4  | NO3  | NO2  | NH4  | TVB     | TVB 13oC | Coliforms | Performance Metric |
|--------|-----------------|-----------|--------|-------|------|------|------|------|------|------|-------|------|------|------|------|---------|----------|-----------|--------------------|
| A      | In service      | 19-Apr-11 | 393.00 | 10.60 | 7.84 | 0.23 | 8.54 | 4.73 | 0.20 | 4.29 | 13.72 | 0.16 | 0.08 | 0.00 | 0.01 | 480.00  | 22.00    | 2.00      | 7                  |
| A      | In service      | 03-May-11 | 407.00 | 12.16 | 7.79 | 0.30 | 9.58 | 5.00 | 0.16 | 3.28 | 0.37  | 0.09 | 0.13 | 0.00 | 0.96 | 6.00    | 38.00    | 0.00      | 9                  |
| A      | In service      | 10-May-11 | 414.00 | 13.00 | 7.81 | 0.22 | 9.19 | 5.08 | 0.18 | 3.50 | 5.39  | 0.24 | 0.13 | 0.00 | 0.01 | 18.00   | 34.00    | 0.20      | 9                  |
| A      | In service      | 17-May-11 | 421.00 | 12.16 | 7.04 | 0.58 | 9.01 | 4.94 | 0.18 | 3.64 | 7.92  | 6.63 | 0.11 | 0.00 | 3.00 | 912.00  | 466.00   | 0.20      | 7                  |
| A      | In service      | 31-May-11 | 435.00 | 12.20 | 7.96 | 0.82 | 8.36 | 5.08 | 0.18 | 3.46 | 6.13  | 0.11 | 0.06 | 0.00 | 2.50 | 35.60   | 1.60     | 0.60      | 7                  |
| A      | Not in service  | 14-Jun-11 | 7.00   | 14.00 | 7.38 | 2.24 | 8.60 | 2.90 | 0.18 | 6.21 | 1.25  | 0.23 | 0.00 | 0.00 | 4.14 | 200.00  | 10.60    | 13.20     | 6                  |
| A      | Not in service  | 21-Jun-11 | 14.00  | 14.48 | 7.12 | 0.80 | 9.01 | 1.81 | 0.17 | 9.30 | 1.62  | 0.48 | 0.00 | 0.00 | 2.30 | 134.00  | 14.00    | 5.20      | 6                  |
| A      | In service      | 28-Jun-11 | 21.00  | 14.30 | 7.30 | 0.30 | 9.02 | 4.51 | 0.19 | 4.23 | 2.20  | 0.01 | 0.00 | 0.00 | 0.02 | 42.00   | 0.00     | 5.60      | 8                  |
| A      | In service      | 06-Jul-11 | 29.00  | 13.68 | 6.94 | 0.26 | 8.36 | 5.00 | 0.20 | 3.94 | 11.67 | 0.04 | 0.01 | 0.00 | 0.02 | 136.00  | 2.00     | 4.40      | 8                  |
| A      | In service      | 12-Jul-11 | 35.00  | 14.44 | 7.00 | 0.29 | 8.85 | 4.92 | 0.18 | 3.66 | 0.31  | 3.62 | 0.01 | 0.00 | 0.02 | 36.40   | 0.80     | 2.20      | 7                  |
| A      | In service      | 19-Jul-11 | 42.00  | 16.50 | 6.94 | 0.22 | 7.92 | 4.90 | 0.18 | 3.71 | 14.10 | 0.03 | 0.04 | 0.00 | 0.04 | 36.40   | 2.00     | 3.00      | 8                  |
| A      | In service      | 26-Jul-11 | 49.00  | 16.90 | 7.00 | 0.28 | 7.85 | 5.06 | 0.21 | 4.11 | 1.22  | 0.02 | 0.03 | 0.00 | 0.02 | 804.00  | 74.00    | 6.00      | 8                  |
| A      | In service      | 24-Aug-11 | 78.00  | 16.42 | 6.90 | 0.21 | 7.71 | 4.45 | 0.10 | 2.22 | 6.06  | 0.07 | 0.05 | 0.00 | 0.02 | 544.00  | 184.00   | 17.20     | 9                  |
| A      | Chlorine added  | 20-Sep-11 | 105.00 | 14.90 | 7.56 | 0.47 | 8.66 | 1.92 | 0.11 | 5.63 | 3.01  | 0.03 | 0.01 | 0.00 | 0.03 | 1290.00 | 164.00   | 19.40     | 8                  |
| B      | Not in service  | 10-May-11 | 7.00   | 12.88 | 7.74 | 0.80 | 9.42 | 5.10 | 0.19 | 3.71 | 5.98  | 0.23 | 0.18 | 0.00 | 0.02 | 186.00  | 540.00   | 366.00    | 7                  |
| B      | Not in service  | 17-May-11 | 14.00  | 11.84 | 6.87 | 0.83 | 9.89 | 4.96 | 0.19 | 3.77 | 8.29  | 0.12 | 0.06 | 0.00 | 5.03 | 250.00  | 76.80    | 4.40      | 6                  |
| B      | Not in service  | 31-May-11 | 28.00  | 12.26 | 6.19 | 0.40 | 9.80 | 5.00 | 0.20 | 4.00 | 4.60  | 0.07 | 0.02 | 0.00 | 2.93 | 25.80   | 2.40     | 2.20      | 7                  |
| B      | In service      | 07-Jun-11 | 35.00  | 13.06 | 7.58 | 0.28 | 8.92 | 2.90 | 0.10 | 3.52 | 5.00  | 0.13 | 0.02 | 0.00 | 0.00 | 6120.00 | 90.00    | 0.20      | 8                  |
| B      | In service      | 14-Jun-11 | 42.00  | 12.70 | 7.22 | 0.39 | 9.40 | 1.81 | 0.10 | 5.52 | 1.41  | 1.21 | 0.02 | 0.01 | 0.01 | 960.00  | 7.60     | 0.80      | 8                  |
| B      | In service      | 21-Jun-11 | 49.00  | 13.48 | 7.10 | 0.29 | 9.22 | 2.75 | 0.19 | 6.72 | 2.00  | 0.03 | 0.02 | 0.01 | 0.30 | 21.90   | 34.00    | 9.40      | 8                  |
| B      | In service      | 28-Jun-11 | 56.00  | 13.48 | 7.22 | 0.20 | 9.23 | 4.82 | 0.20 | 4.04 | 2.22  | 0.02 | 0.00 | 0.00 | 0.03 | 36.00   | 0.00     | 0.80      | 9                  |
| B      | In service      | 06-Jul-11 | 64.00  | 13.40 | 7.00 | 0.29 | 9.30 | 4.97 | 0.20 | 4.02 | 3.20  | 0.04 | 0.01 | 0.02 | 0.03 | 172.00  | 0.00     | 0.20      | 9                  |
| B      | In service      | 12-Jul-11 | 70.00  | 14.10 | 7.08 | 0.18 | 9.95 | 4.90 | 0.19 | 3.84 | 0.21  | 1.19 | 0.00 | 0.00 | 0.05 | 19.60   | 0.80     | 0.80      | 8                  |
| B      | In service      | 19-Jul-11 | 77.00  | 16.30 | 7.10 | 0.18 | 8.68 | 4.60 | 0.18 | 4.00 | 8.43  | 0.35 | 0.02 | 0.00 | 0.04 | 311.20  | 5.60     | 0.40      | 8                  |
| B      | In service      | 26-Jul-11 | 84.00  | 16.20 | 7.10 | 0.20 | 8.80 | 4.70 | 0.22 | 4.74 | 4.07  | 0.04 | 0.02 | 0.00 | 0.03 | 2490.00 | 112.00   | 0.40      | 9                  |
| B      | In service      | 24-Aug-11 | 113.00 | 14.88 | 7.00 | 0.14 | 9.50 | 5.08 | 0.10 | 1.97 | 5.26  | 0.02 | 0.03 | 0.00 | 0.03 | 550.00  | 276.00   | 1.40      | 9                  |
| B      | Chlorine added  | 20-Sep-11 | 140.00 | 12.94 | 7.22 | 0.22 | 9.84 | 2.91 | 0.11 | 3.81 | 4.42  | 0.01 | 0.01 | 0.00 | 0.01 | 1160.00 | 226.00   | 0.80      | 9                  |
| B      | Chlorine added  | 18-Oct-11 | 168.00 | 9.48  | 6.70 | 0.26 | 9.77 | 6.10 | 0.11 | 1.80 | 12.26 | 0.31 | 0.06 | 0.00 | 0.02 | 50.00   | 296.00   | 1.20      | 8                  |
