# Supplementary material for: The Relationship between Microbial Community Evenness and Function in Slow Sand Filters
Source: PubMed Central journal article supplement — mBio. 2015 Oct 13;6(5):e00729-15. doi: 10.1128/mBio.00729-15 (PMC4620458; doi:10.1128/mbio.00729-15), 2015-10-13
Supplement: mbo005152502sf4.pdf [file mbo005152502sf4.pdf]

Average (based on 5 replicas) Percentage Removal of various Water Quality Parameters from 2 industrial slow sand filters

| Filter | Additional Info | Sampled   | Age | TEMP  | PH    | NTU     | DO    | DOC     | UV     | SUVA   | COD    | PO4     | NO3     | NO2     | NH4     | TVB     | TVB 13oC | Coliforms |
|--------|-----------------|-----------|-----|-------|-------|---------|-------|---------|--------|--------|--------|---------|---------|---------|---------|---------|----------|-----------|
| A      | In service      | 19-Apr-11 | 393 | 15.87 | 1.63  | 80.51   | 3.07  | 1.46    | -93.33 | -95.89 | -70.44 | 32.23   | -700.00 | 66.67   | 96.15   | 82.86   | 97.80    | 99.78     |
| A      | In service      | 03-May-11 | 407 | 1.94  | 0.64  | 74.96   | 4.29  | 1.96    | 17.17  | 15.46  | -17.14 | 29.55   | -712.50 | 100.00  | 54.91   | 95.16   | 97.10    | 100.00    |
| A      | In service      | 10-May-11 | 414 | -2.36 | 2.25  | 85.90   | 5.35  | -0.59   | 16.04  | 16.53  | -120.8 | 63.25   | -251.35 | -200.00 | 0.00    | 79.55   | 98.99    | 99.05     |
| A      | In service      | 17-May-11 | 421 | 3.34  | 11.89 | 84.90   | 1.87  | -0.20   | 18.18  | 18.35  | -67.73 | -6738   | -224.24 | -100.00 | -1742   | -160.57 | -316.07  | 99.04     |
| A      | In service      | 31-May-11 | 435 | 4.54  | 5.69  | 37.08   | 18.80 | -1.20   | 15.38  | 16.38  | 32.85  | 98.09   | -500.00 | 100.00  | 5.05    | 32.60   | 89.60    | 95.65     |
| A      | Not in service  | 14-Jun-11 | 7   | -3.86 | 8.44  | -151.12 | 15.47 | 3.33    | 7.69   | 4.51   | 24.88  | 94.24   | 100.00  | 66.67   | -38.00  | 19.70   | 90.20    | 38.89     |
| A      | Not in service  | 21-Jun-11 | 14  | -1.40 | 2.47  | 14.68   | 7.25  | 5.04    | 7.69   | 2.79   | 10.00  | 93.92   | 75.00   | 100.00  | 13.09   | 25.56   | 61.11    | 90.15     |
| A      | In service      | 28-Jun-11 | 21  | 5.55  | -1.11 | 44.55   | 9.64  | 13.39   | 3.54   | -11.32 | 9.09   | 23.08   | 100.00  | 100.00  | 45.95   | 27.59   | 100.00   | 78.29     |
| A      | In service      | 06-Jul-11 | 29  | -0.29 | 3.61  | 55.92   | 13.97 | 2.34    | 10.45  | 8.31   | -1067  | 6.98    | 0.00    | 20.00   | 48.65   | 52.78   | 66.67    | 95.10     |
| A      | In service      | 12-Jul-11 | 35  | 3.35  | 4.37  | 57.40   | 11.36 | 5.93    | 15.09  | 9.63   | 5.83   | 40.00   | 30.00   | 100.00  | 0.00    | 22.55   | 90.00    | 89.22     |
| A      | In service      | 19-Jul-11 | 42  | 0.96  | 2.25  | 69.21   | 9.07  | 2.00    | 9.00   | 7.25   | -1.22  | 0.00    | -300.00 | 33.33   | -42.86  | 67.21   | 87.34    | 92.19     |
| A      | In service      | 26-Jul-11 | 49  | 2.87  | 1.41  | 56.21   | 16.93 | 17.05   | 11.86  | -6.25  | 82.89  | 99.70   | -200.00 | -33.33  | -200.00 | -323.16 | 33.93    | 92.67     |
| A      | In service      | 24-Aug-11 | 78  | -4.32 | 3.09  | 10.64   | 17.19 | -0.68   | 10.00  | 10.84  | 1.46   | 99.15   | -150.00 | 87.50   | -216.67 | -312.12 | -142.11  | 59.81     |
| A      | Chlorine added  | 20-Sep-11 | 105 | 4.49  | -2.16 | 30.95   | 5.87  | -0.52   | 2.70   | 3.21   | -1.35  | -200.00 | 100.00  | 50.00   | 39.53   | -103.47 | -30.16   | 46.41     |
| B      | Not in service  | 10-May-11 | 7   | -2.38 | 3.25  | 38.35   | 3.70  | -3.03   | 15.25  | 17.74  | -206.7 | -24.04  | -215.79 | 0.00    | -566.67 | 14.68   | 9.40     | -9.58     |
| B      | Not in service  | 17-May-11 | 14  | 3.90  | 12.93 | 26.03   | -7.90 | 0.20    | 16.89  | 16.72  | -86.42 | -155.32 | -34.04  | 0.00    | -53.77  | -14.68  | 26.15    | 83.33     |
| B      | Not in service  | 31-May-11 | 28  | 2.70  | -5.63 | 58.72   | 5.75  | 3.29    | 7.83   | 4.70   | 5.49   | 66.82   | 0.00    | 0.00    | 8.34    | 42.90   | 77.40    | 79.25     |
| B      | In service      | 07-Jun-11 | 35  | 3.55  | 2.57  | 65.82   | 8.63  | 6.45    | 15.00  | 9.14   | 0.08   | 96.81   | -100.00 | 100.00  | 70.00   | -1810   | -181.00  | 88.90     |
| B      | In service      | 14-Jun-11 | 42  | 7.30  | 7.20  | 50.63   | 7.89  | 32.96   | 9.91   | -34.39 | 37.67  | 78.60   | -100.00 | 22.22   | 0.00    | 48.40   | 52.50    | 96.12     |
| B      | In service      | 21-Jun-11 | 49  | 3.85  | -1.72 | 82.43   | 4.20  | 4.97    | 10.19  | 5.50   | 4.76   | 71.96   | -900.00 | 12.50   | 67.64   | 96.26   | -100.00  | 73.74     |
| B      | In service      | 28-Jun-11 | 56  | 9.65  | 0.55  | 63.96   | 8.23  | 2.51    | 10.96  | 8.80   | 5.53   | 75.90   | 100.00  | 75.00   | -170.00 | 85.83   | 100.00   | 97.62     |
| B      | In service      | 06-Jul-11 | 64  | -0.30 | 1.13  | 52.40   | 6.74  | 3.31    | 9.09   | 5.98   | 71.93  | 36.51   | 56.52   | -300    | -160.00 | 35.82   | 0.00     | 99.80     |
| B      | In service      | 12-Jul-11 | 70  | 4.21  | 1.94  | 73.38   | 0.50  | 7.37    | 11.74  | 4.71   | 0.96   | 28.79   | 100.00  | 0.00    | -300.00 | 55.05   | 86.67    | 97.35     |
| B      | In service      | 19-Jul-11 | 77  | 2.98  | 0.00  | 77.03   | 2.69  | 8.00    | 16.36  | 9.09   | 15.95  | 95.14   | 0.00    | 0.00    | 11.36   | -313.83 | 90.11    | 99.16     |
| B      | In service      | 26-Jul-11 | 84  | 4.14  | 0.00  | 75.12   | 9.37  | 33.80   | 11.16  | -34.21 | 21.43  | 42.86   | 33.33   | -33.33  | -420.00 | -66.00  | 38.80    | 98.39     |
| B      | In service      | 24-Aug-11 | 113 | 3.63  | -2.34 | 58.62   | 0.63  | -10.20  | 10.71  | 17.23  | -2.94  | 96.41   | 25.00   | 50.00   | -366.67 | 6.14    | -16.95   | 91.25     |
| B      | Chlorine added  | 20-Sep-11 | 140 | 1.37  | 5.99  | 86.14   | 3.72  | 0.34    | 5.13   | 4.80   | -33.94 | 94.82   | 0.00    | 100.00  | 64.52   | 24.18   | 64.47    | 98.43     |
| B      | Chlorine added  | 18-Oct-11 | 168 | -2.82 | 2.90  | 24.33   | 3.93  | -162.93 | 5.17   | 63.93  | -1126  | 93.98   | 0.00    | 0.00    | -18.75  | 85.38   | -25.42   | 50.00     |
