# Supplementary figures and images for: The Relationship between Microbial Community Evenness and Function in Slow Sand Filters
Source: PubMed Central journal article supplement — mBio. 2015 Oct 13;6(5):e00729-15. doi: 10.1128/mBio.00729-15 (PMC4620458; doi:10.1128/mbio.00729-15), 2015-10-13

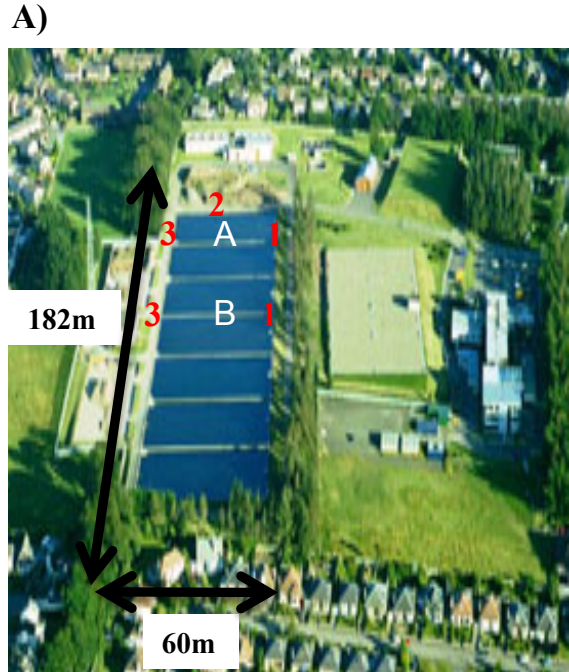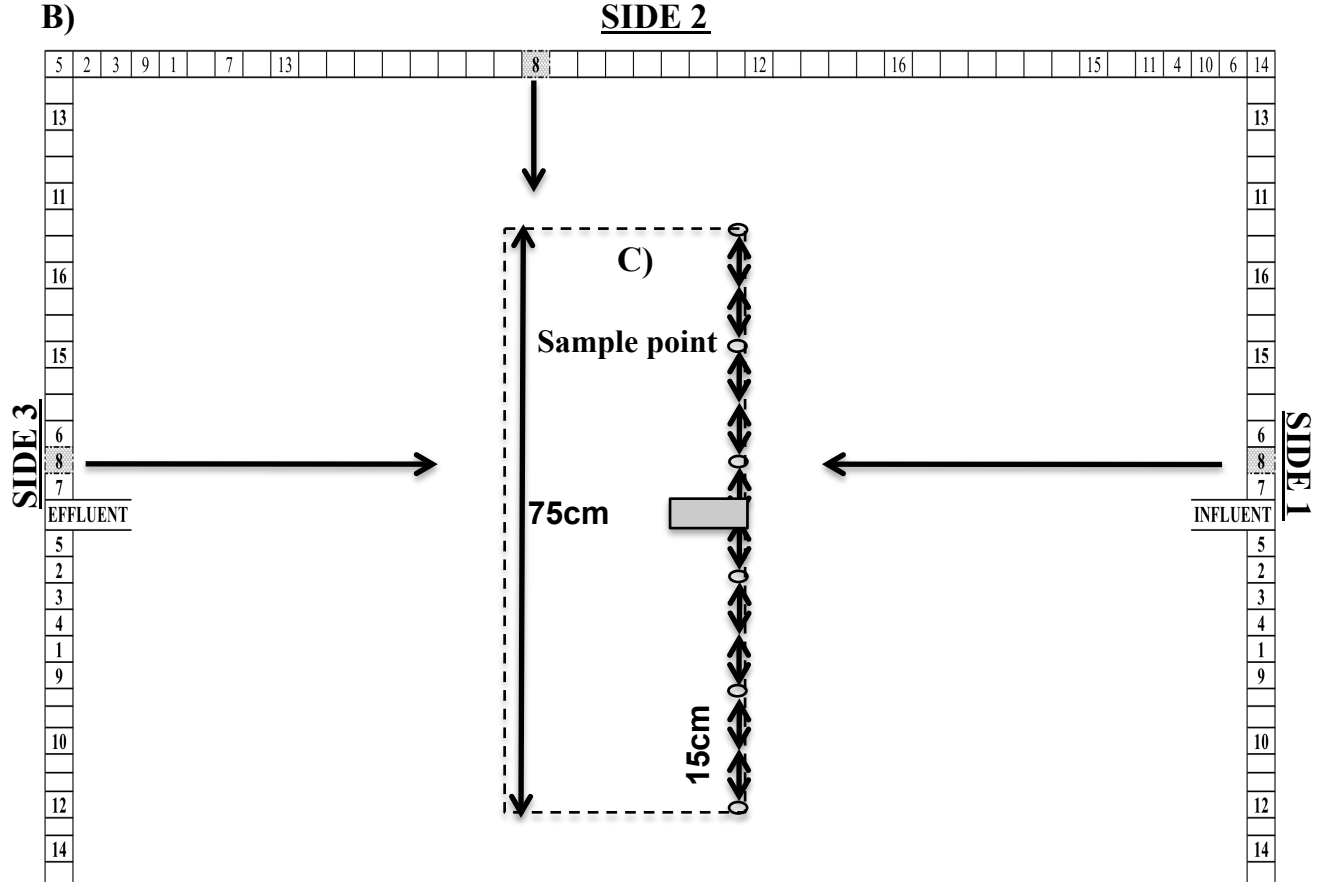

Supplement: mbo005152502sf1.pdf [file mbo005152502sf1.pdf]

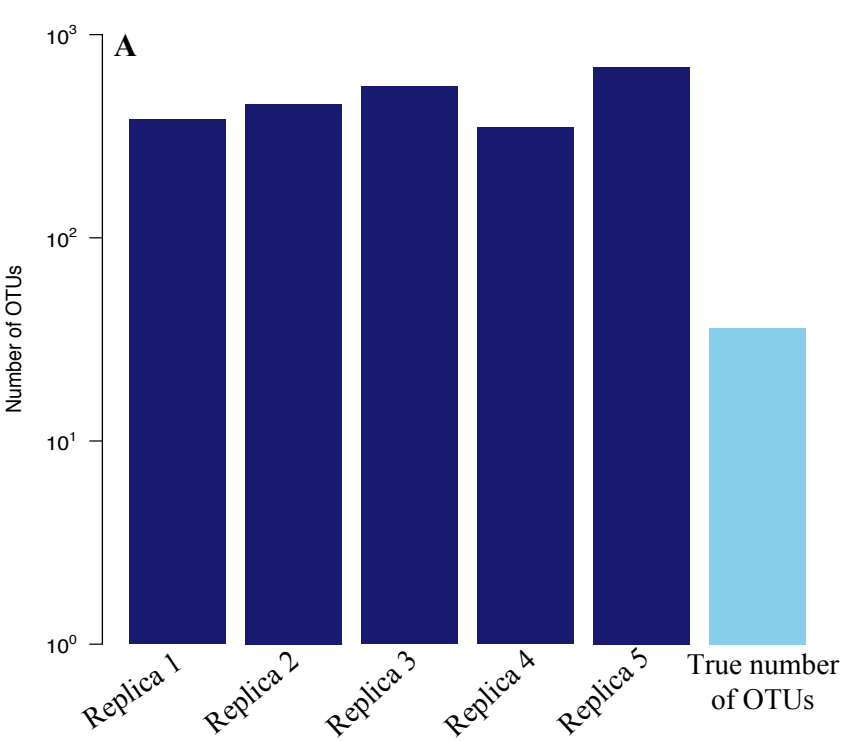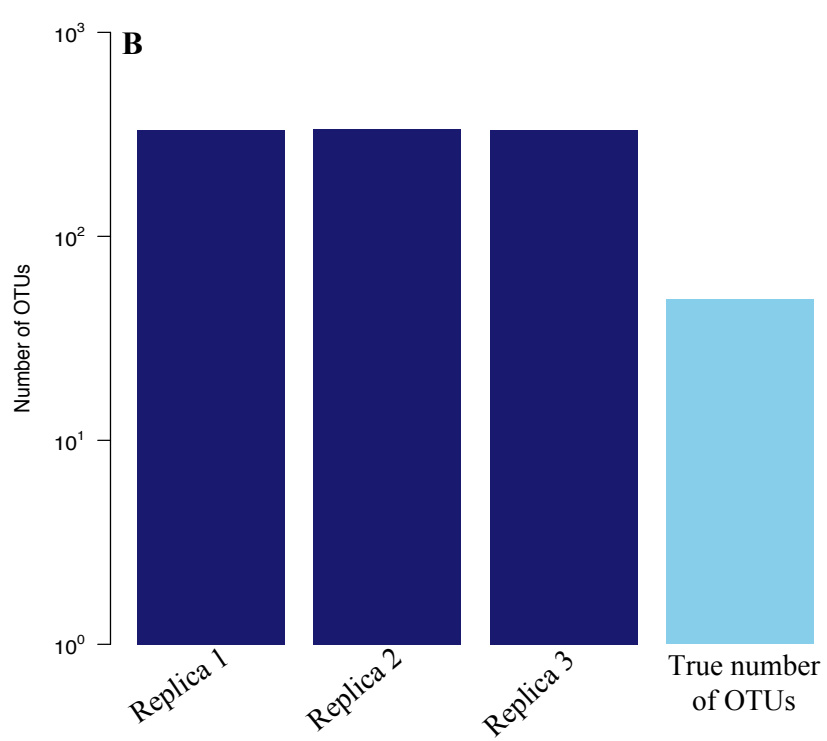

Supplement: mbo005152502sf6.pdf [file mbo005152502sf6.pdf]

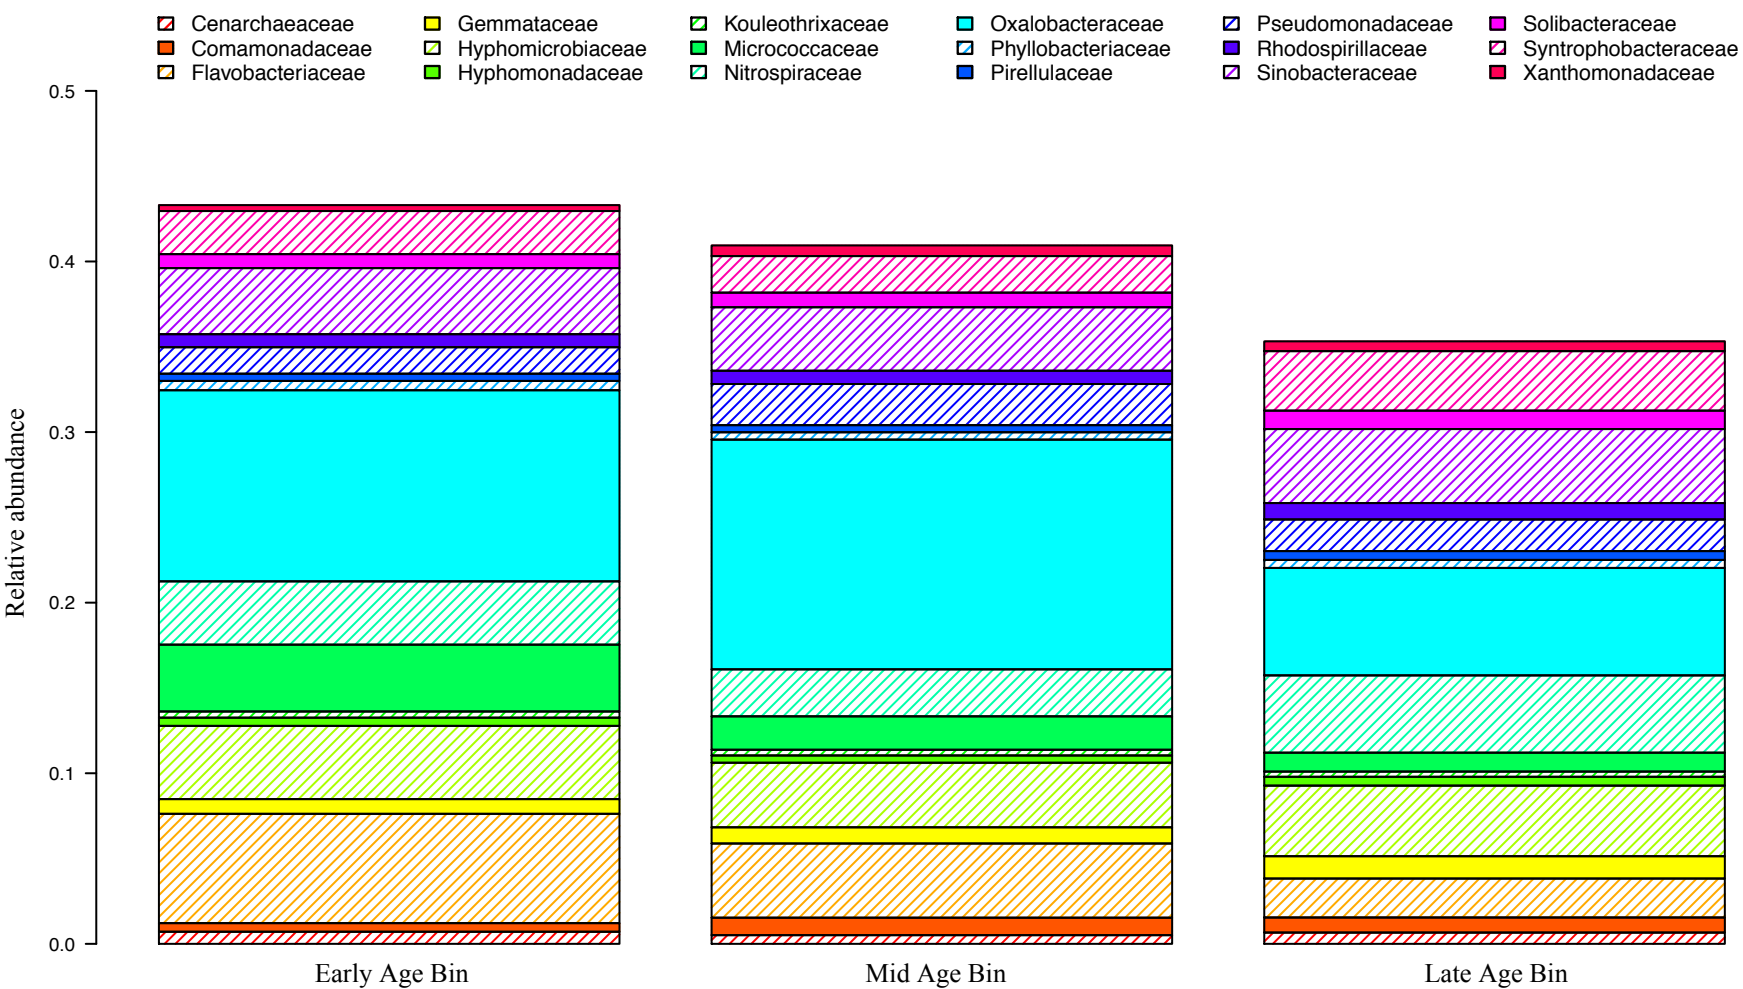

Supplement: mbo005152502sf7.pdf [file mbo005152502sf7.pdf]

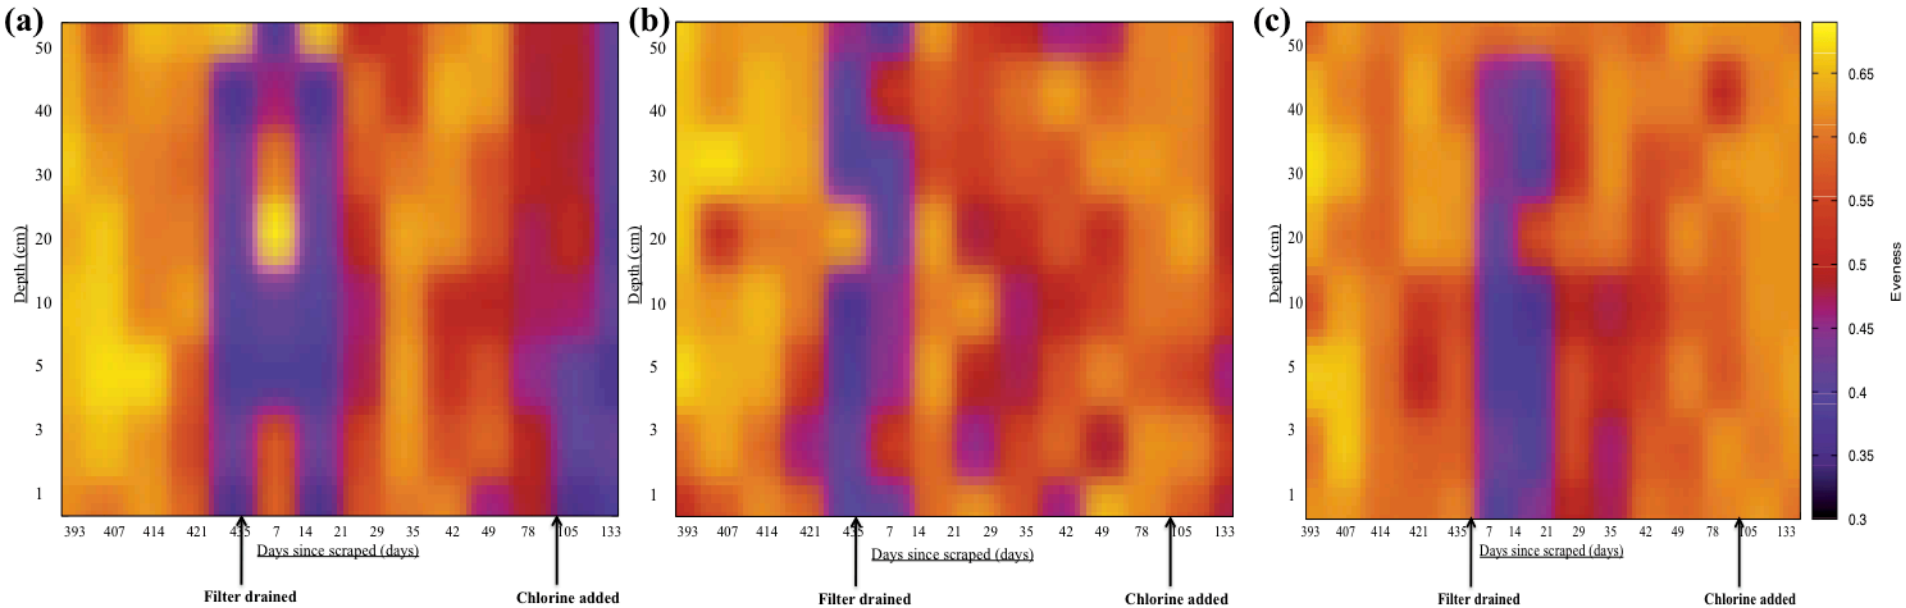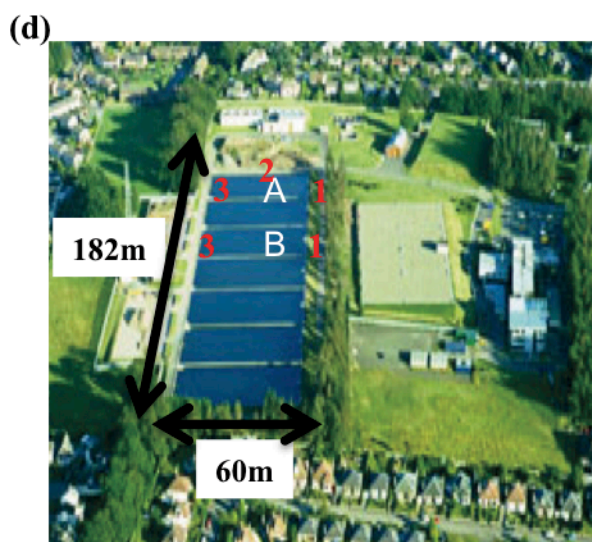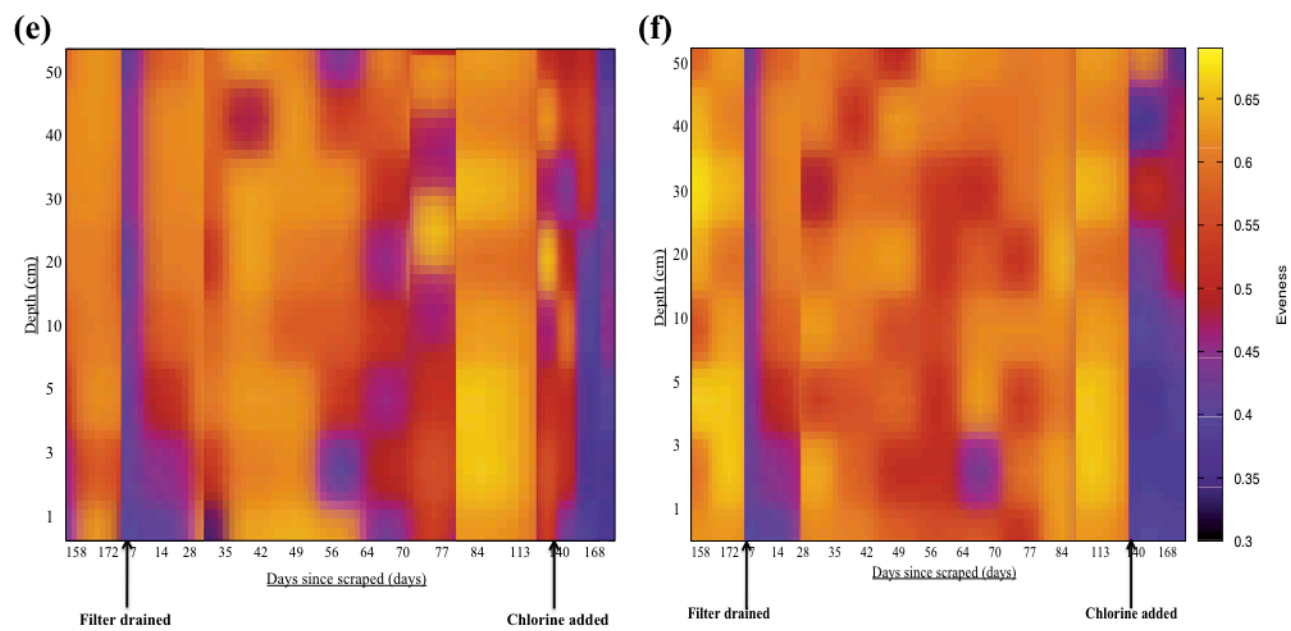

Supplement: mbo005152502sf8.pdf [file mbo005152502sf8.pdf]

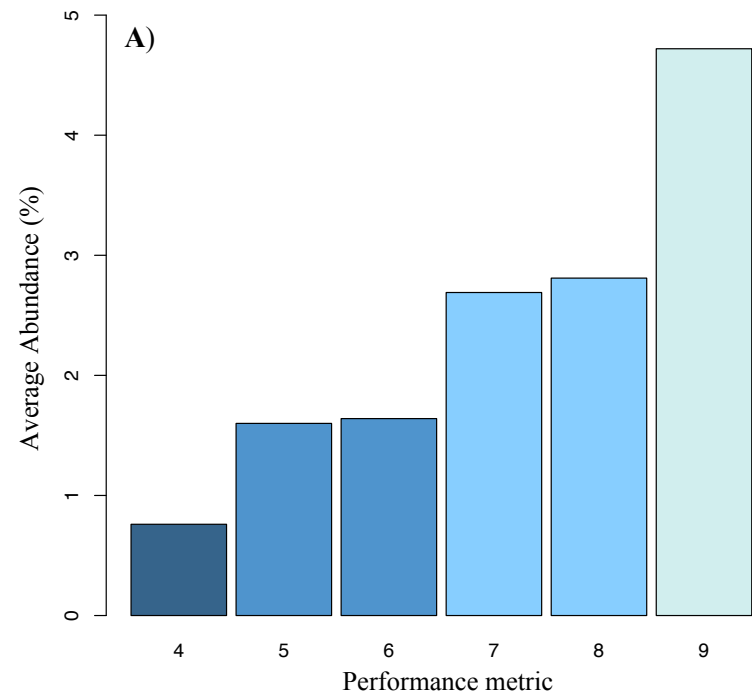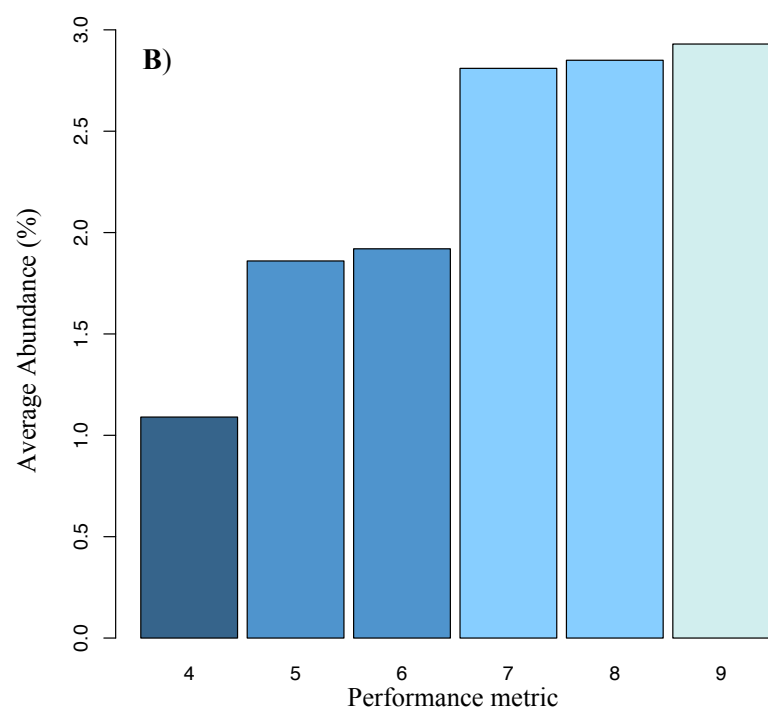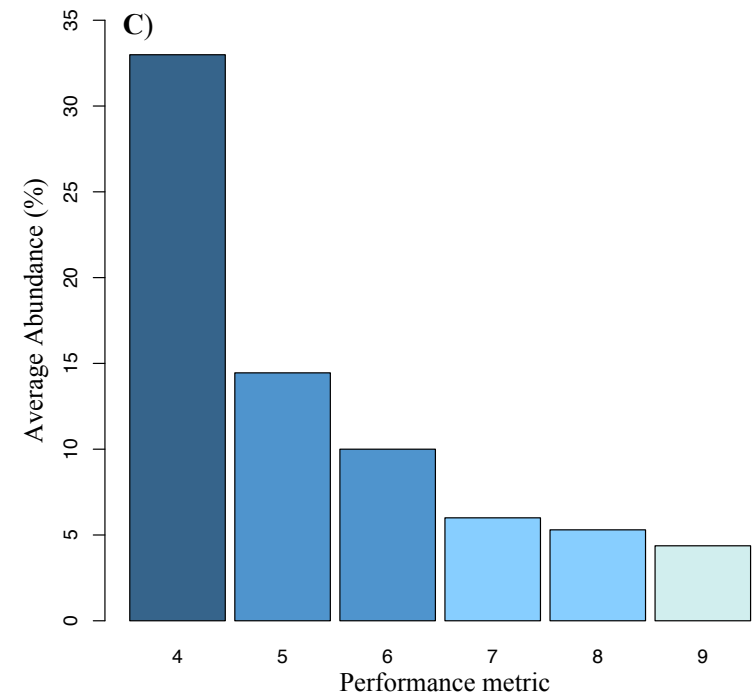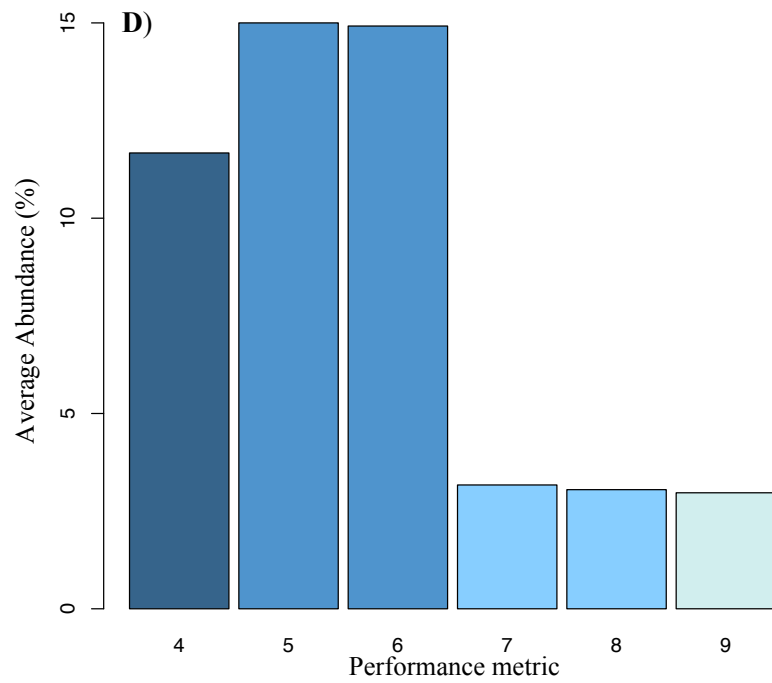

Supplement: mbo005152502sf9.pdf [file mbo005152502sf9.pdf]
